# Supplementary material for: α–Intercalated cells defend the urinary system from bacterial infection
Source: JCI journal article supplement (doi:10.1172/jci71630), 2014-06-16
Supplement: sd1 [file 1]

**Supplemental Figure S1: Generation of the  $LCN2^{loxP/loxP}$  mice.** (A) A *loxP* site was inserted into intron 1 (yellow arrowhead), and a neomycin cassette (light blue box) was inserted into intron 5 flanked by *FRT* (red arrowhead) and *loxP* sites. The neomycin cassette was excised by crossing  $LCN2^{loxPneo/+}$  with FLP Recombinase (FLP) mice generating  $LCN2^{loxP/+}$ .  $LCN2^{loxP/+}$  was bred against C57BL/6 animals to remove FLP and then subsequently bred with EIIa-*Cre* mice to induce recombination between the intron1 *loxP* and the intron5 *loxP* creating  $LCN2^{del/+}$ , EIIa-*Cre* mice. (B) Genotyping strategy. Note that only the wild type allele (250 bp) was amplified with L5F and A4R primers because the PCR parameters did not amplify across Neomycin cassette in the “targeted allele”. (C) Recombination in the Cre-deleted allele was authenticated by sequencing the Lox2F-A4R PCR product.

**A**

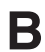
$$\frac{\frac{\text{L5F}}{\text{A4R}} \quad \frac{\text{N1F}}{\text{A4R}} \quad \frac{\text{L5F}}{\text{A4R}} \quad \frac{\text{lox2F}}{\text{A4R}}}{\frac{\text{L5F}}{\text{A4R}}} \quad \frac{\text{N1F}}{\text{A4R}}$$
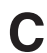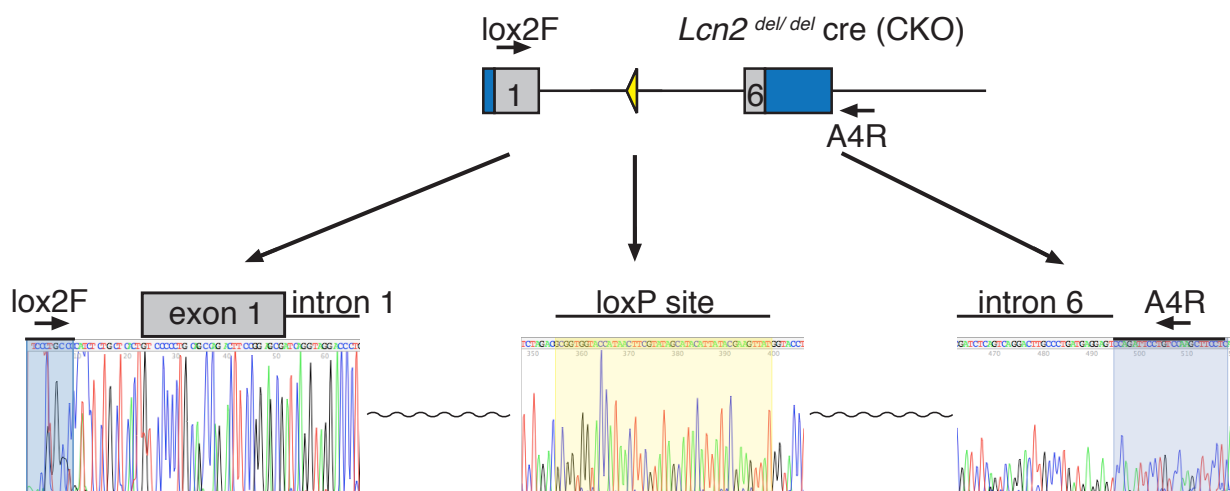

**Supplemental Figure S2: UPEC-Lux.** Lux operon was inserted by conjugation at the Tn site with the Tn5-lux system in Gram-negative (CFT073) bacteria. Positive conjugates were selected on LB agar plates for luminescent signal.

Fig. S2

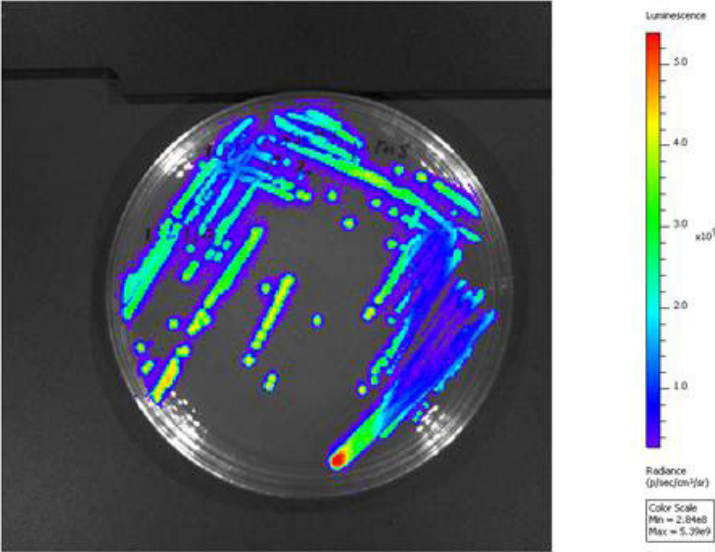

**Supplemental Figure S3: Analysis of kidney and bladder in C57BL/6 infected mice (cystitis model) (A)** Recovery of UPEC from kidney and bladder 1d post-transurethral inoculation (TU). Intraperitoneal (IP) inoculation served as a positive control ( $n = 4$  each). CFUs in the kidney of the TU inoculated mice were at/below the limit of detection (kidney LOD =  $10^2$ , red hashed line; bladder LOD =  $10^3$  green dotted line).

Fig. S3

A

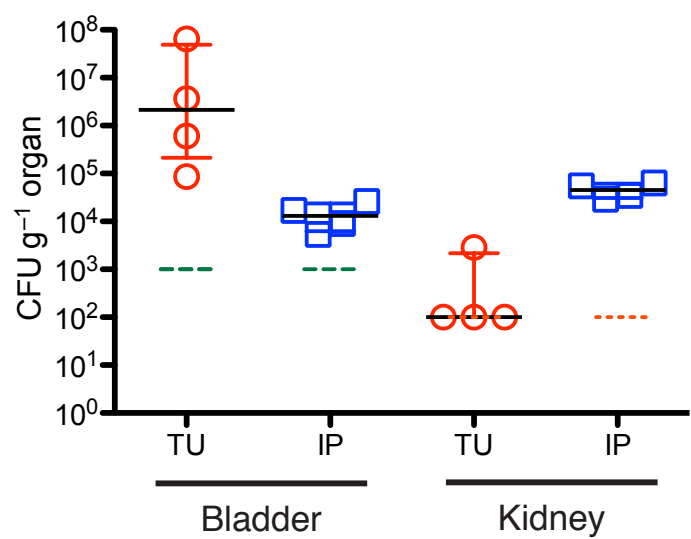

**Supplemental Figure S4: Non-canonical LCN2 Activation:** (A) We found on average a  $2.9 \pm 0.68$  fold increase in *Lcn2* message ( $n = 5$ ,  $P = 0.0369$ ) at 6 h post Ent treatment and a  $4.1 \pm 0.35$  ( $n = 2$ ,  $P = 0.0382$ ) fold increase at 12 h. (B) uLCN2 was detected in mouse urine after *i.p.* injection of Ent (peak 9 h).

Fig. S4

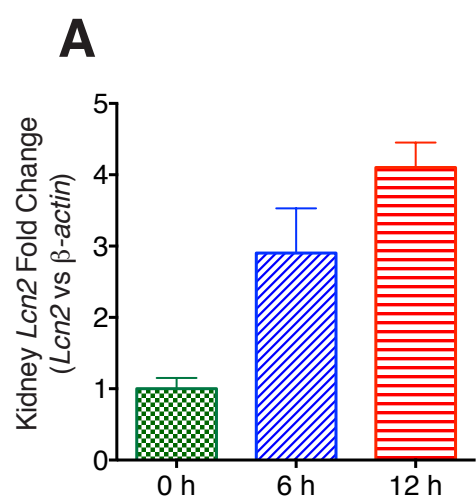

**B**

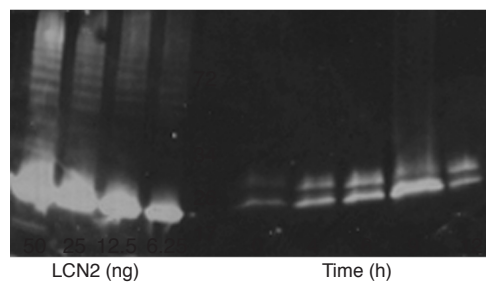

**Supplemental Figure S5: UPEC-GFP.** GFPuv was expressed under control of the *E.coli lacZ* promoter (pGFPuv plasmid, Clontech). **(A)** UPEC-GFP visible on LB agar plates. **(B)** Rod shaped UPEC-GFP were seen at high power (100x).

Fig. S5

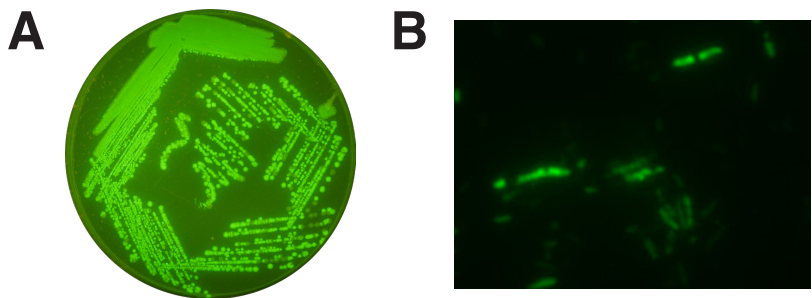

**Supplemental Figure S6: Secretion of LCN2 from bladder.** (A) C57BL/6 mice were treated with LPS (*i.p.* 1 mg kg<sup>-1</sup>) and bladders explanted on a filter. LCN2 was detected in the culture media. Bladders from LPS treated mice secreted 2 fold (12 h of explant) and 5 fold (24 h of explant) higher levels of LCN2 than did control bladders (*n* = 3 independent experiments). (B) LCN2 was detected by western blot using 100% of media conditioned by 6 bladders. Comparison with standard protein (50 ng), demonstrated that explanted bladders secreted LCN2.

Fig. S6

**A**

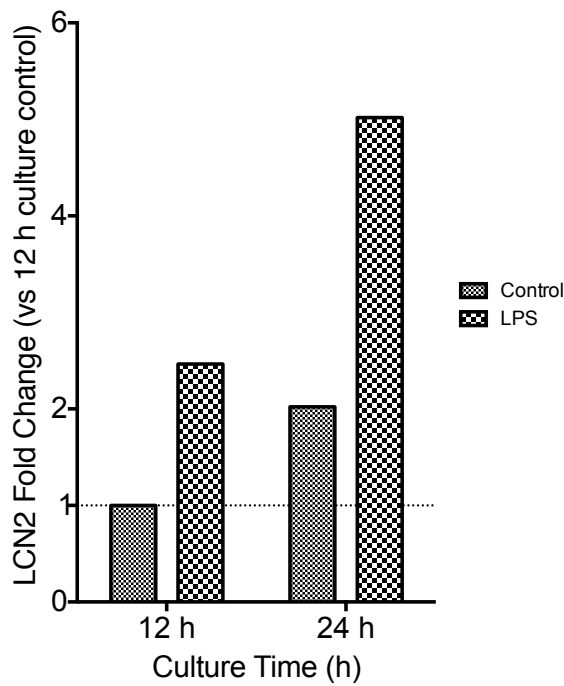

**B**

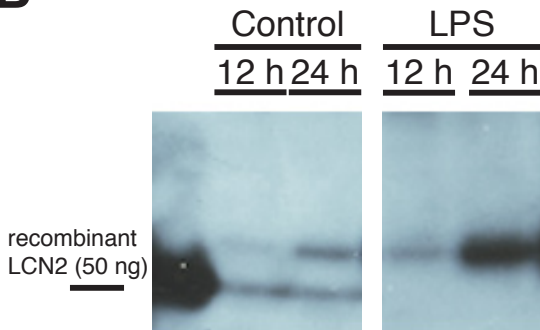

**Supplemental Figure S7: Coomassie Brilliant Blue stain of WT and KO urine. *Tcfcp2l1*<sup>*flax/flax*</sup>; Ksp-Cre (IC-Knockout) animals did not show excess proteinuria.**

Fig. S7

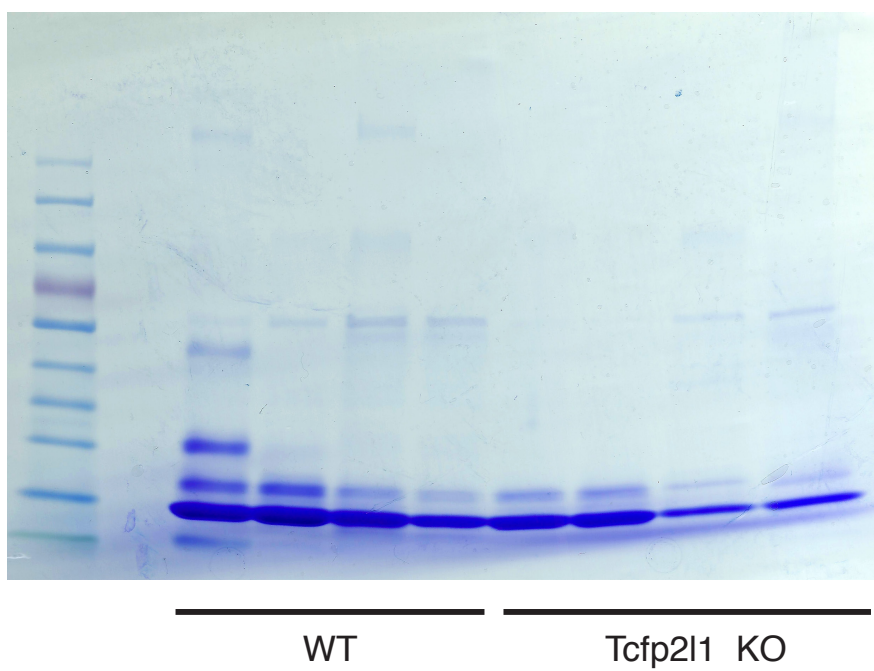

**Supplemental Table 1: List of PCR and qPCR primers**

Table S1

| <b>Primer Name</b>                              |                                       |
|-------------------------------------------------|---------------------------------------|
| <b><i>Lcn2</i> flox/flox genotyping primers</b> |                                       |
| lox2F                                           | 5' - AAGACTCAACTCAGAACTTGATCC - 3'    |
| A4R                                             | 5' - GAGGAAGCTTGGACAGGAATCTGG - 3'    |
| L5F                                             | 5' - ACGACAACATCATCTTCTCTGTCC - 3'    |
| N1F                                             | 5' - TCGAGGCCAGAGGCCACTTGTGTAGC - 3'  |
| Lcn2R                                           | 5' - GTCCTTCTCACTTTGACAGAAGTCAGG - 3' |
| Lcn2F                                           | 5' - CACATCTCATGCTGCTCAGATAGCCAC - 3' |

| <b>Standard QPCR</b> |                                     |
|----------------------|-------------------------------------|
| <b>Gene Symbol</b>   |                                     |
| <i>Lcn2</i>          |                                     |
| Forward              | 5' - CTCAGAACTTGATCCCTGCC - 3'      |
| Reverse              | 5' - TCCTTGAGGCCAGAGACTT - 3'       |
| <i>bact</i>          |                                     |
| Forward              | 5' - CTAAGGCCAACCGTGAAAAG - 3'      |
| Reverse              | 5' - TCTCAGCTGTGGTGGTGAAG - 3'      |
| <i>gapA</i>          |                                     |
| Forward              | 5' - AAGTTGGTGTGACGTTGTCGC - 3'     |
| Reverse              | 5' - AGCGCCTTTAACGAACATCG - 3'      |
| <i>chuA</i>          |                                     |
| Forward              | 5' - AGCGTGTGAGATTGTTGCG - 3'       |
| Reverse              | 5' - AAACCACTGCTTTGTCCTTCCTGC - 3'  |
| <i>chuS</i>          |                                     |
| Forward              | 5' - CTGTTTCTCAATCAATGGGCCAGTG - 3' |
| Reverse              | 5' - TATGCCACCGACAATACCGATATGG - 3' |
| <i>chuT</i>          |                                     |
| Forward              | 5' - AGCTGGACTTTTAGCGTAACGGCTG - 3' |
| Reverse              | 5' - CGACATCTTATCCACCAGAAACCGC - 3' |
| <i>chuW</i>          |                                     |
| Forward              | 5' - GCCACTGGCCCCTGATTGTGAA - 3'    |
| Reverse              | 5' - AATCCGCAAGAAAATGGCCCG - 3'     |
| <i>entA</i>          |                                     |
| Forward              | 5' - TAGCTGAAACGGAGCGACTGGACG - 3'  |
| Reverse              | 5' - ACGTCGCGCGGTGCGTTTAACCT - 3'   |
| <i>entC</i>          |                                     |
| Forward              | 5' - CCAAAGCGCAGGGCATCAA - 3'       |
| Reverse              | 5' - AAAACAAGCTTCCGCACGCCG - 3'     |
| <i>entE</i>          |                                     |
| Forward              | 5' - AGCGGGGATGATTTCTCAACAC - 3'    |
| Reverse              | 5' - GCTGAGGATTTACTGCCACGCC - 3'    |
| <i>entF</i>          |                                     |
| Forward              | 5' - CGCTGTTCCGGTCCGGTACTCAA - 3'   |
| Reverse              | 5' - TGAAGTGGCCCTGTTCCCGGAT - 3'    |
| <i>fhuA</i>          |                                     |
| Forward              | 5' - ACGGCCAAAGCCAGAATAAC - 3'      |
| Reverse              | 5' - TTACCGTAAAGCACGGAAACCG - 3'    |
| <i>iroB</i>          |                                     |
| Forward              | 5' - CCGGTCTGGATTCCGAAGCTGGTTA - 3' |
| Reverse              | AGACCATCTGGTGGAGTTTGCCG - 3'        |
| <i>iroN</i>          |                                     |
| Forward              | 5' - ATTACCAAACGTCCCAACCAACG - 3'   |
| Reverse              | 5' - AAACGCGTGGTAAGAGCATCAC - 3'    |
| <i>iucA</i>          |                                     |
| Forward              | 5' - CCCATACGCAACAGGCAATTGATG - 3'  |
| Reverse              | 5' - CACCTGCGCCTAAGTCTCATGA - 3'    |
| <i>iucD</i>          |                                     |
| Forward              | 5' - CTTACGCGAAGAAATGGCAGACCA - 3'  |
| Reverse              | 5' - TGATATACCGGTCGTGATGCAAAC - 3'  |
| <i>sitB</i>          |                                     |
| Forward              | 5' - GGCGTTACAGAAAAACCTGGTTGCC - 3' |
| Reverse              | 5' - ATGGGTATGTTGCGTATCGCCAAA - 3'  |
| <i>sitA</i>          |                                     |
| Forward              | 5' - GCACTCACCTGCTCGATCGCAT - 3'    |
| Reverse              | 5' - TCTCATCCATAACCAAGCCTGGTGC - 3' |

| <b>Taqman Genes</b> |               |
|---------------------|---------------|
| Gene Symbol         | Assay ID      |
| Actb                | Mm01205647_g1 |
| Ccl2                | Mm00441242_m1 |
| Ccl5                | Mm01302427_m1 |
| Csf3                | Mm00438334_m1 |
| Cxcl1               | Mm01354329_g1 |
| Cxcl10              | Mm00445235_m1 |
| Cxcl12              | Mm00445552_m1 |
| Il18                | Mm00434225_m1 |
| Il1a                | Mm00439621_m1 |
| Il1b                | Mm00434228_m1 |
| Il2                 | Mm00434256_m1 |
| Il6                 | Mm00446191_m1 |
| Jun                 | Mm00495062_s1 |
| Lcn2                | Mm01324470_m1 |
